# Supplementary material for: Performance of the BD Phoenix CPO detect assay for detection and classification of carbapenemase-producing organisms
Source: Eur J Clin Microbiol Infect Dis. 2020 Nov 27;40(5):979–85. doi: 10.1007/s10096-020-04094-1 (PMC8084821; doi:10.1007/s10096-020-04094-1)
Supplement: Supplementary file 1 — (XLSX 206 kb). [file 10096_2020_4094_MOESM1_ESM.xlsx]

## Sheet: Blatt1
isolate number	year	group	Subpecies	Species	LDT multiplex PCR result	CIM	Phoenix Carbapenemase detection positive/negative	evaluation detection	Phoenix carbapenemase classification	evaluation classification	PHX_MHK_AMIKACIN	PHX_SIR_AMIKACIN	ETE_MHK_AMIKACIN	ETE_SIR_AMIKACIN	PHX_MHK_AMC	PHX_SIR_AMC	PHX_MHK_AMP	PHX_SIR_AMP	VIT_MHK_AMP	VIT_SIR_AMP	VIT_MHK_AMS	VIT_SIR_AMS	ETE_MHK_AMS	ETE_SIR_AMS	PHX_MHK_AZTREONAM	PHX_SIR_AZTREONAM	VIT_MHK_AZTREONAM	VIT_SIR_AZTREONAM	ETE_MHK_AZTREONAM	ETE_SIR_AZTREONAM	PHX_MHK_CEFEPIM	PHX_SIR_CEFEPIM	VIT_MHK_CEFEPIM	VIT_SIR_CEFEPIM	ETE_MHK_CEFEPIM	ETE_SIR_CEFEPIM	PHX_MHK_CEFIXIM	PHX_SIR_CEFEXIM	PHX_MHK_CAZ	PHX_SIR_CAZ	VIT_MHK_CAZ	VIT_SIR_CAZ	ETE_MHK_CAZ	ETE_SIR_CAZ	PHX_MHK_CAZAVI	PHX_SIR_CAZAVI	VIT_MHK_CAZAVI	VIT_SIR_CAZAVI	ETE_MHK_CAZAVI
76354589	17-	Non-fermenter	P.aeruginosa	P.aeruginosa	GES		neg	false negative	-	false negative	<=4	S			>32/2	R	>8	R							>16	R					>16	R			32	R	>2		>8	R			32	R	2	S			4
76094784	17-	Non-fermenter	P.aeruginosa	P.aeruginosa	VIM		pos	true positive	CarbB	true positive	16	I	32	R	>32/2	R	>8	R							8	I					>16	R					>2		>8	R		R			>8/4	R
76094200	17-	Non-fermenter	P.aeruginosa	P.aeruginosa	negative	negative	neg	true negative	-	true negative	8	S			>32/2	R	>8	R							>16	R					>16	R			32	R	>2		>8	R		R			>8/4	R			32
76353892	17-	Non-fermenter	P.aeruginosa	P.aeruginosa	negative	negative	pos	false positive	CarbA	false positive	<=4	S	8	S	>32/2	R	>8	R							>16	R					>16	R					>2		>8	R		R			2	S			4
76092832	17-	Enterobacterales	Klebsiella species	K.pneumoniae	negative	negative	pos	false positive	Carb	true negative	<=4	S			>32/2	R	>8	R		R		R			>16	R					>16	R					>2	R	>8	R		R			1	S			4
76090126	17-	Non-fermenter	P.aeruginosa	P.aeruginosa	IMP		pos	true positive	CarbB	true positive	<=4	S	0.5		>32/2	R	>8	R							16	I					>16	R			>=256		>2		>8	R		R			>8/4	R
76087962	17-	Enterobacterales	Enterobacter species	Enterobacter cloacae komplex	Oxa-48		pos	true positive	CarbD	true positive	<=4	S			>32/2	R	>8	R		R		R			8	R			16	R	8	R					>2	R	4	I		R			0,5/4	S			1
76087210	17-	Non-fermenter	P.aeruginosa	P.aeruginosa	negative	negative	pos	false positive	Carb	true negative	<=4	S			>32/2	R	>8	R							>16	R					>16	R			>=256		>2		>8	R			>=256	R	>8/4	R
76353233	17-	Non-fermenter	P.aeruginosa	P.aeruginosa	negative	negative	pos	false positive	CarbA	false positive	8	S	64	R	>32/2	R	>8	R							>16	R			64	R	>16	R			64	R	>2		>8	R		R			>8/4	R			32
76078723	17-	Enterobacterales	E.coli	Escherichia coli (4MRGN)	negative	negative	pos	false positive	CarbB	false positive	<=4	S			>32/2	R	>8	R		R					8	R					>16	R					>2	R	8	R		R			0.5	S			8
76078243	17-	Non-fermenter	P.aeruginosa	P.aeruginosa	negative	negative	pos	false positive	CarbA	false positive	<=4	S	2	S	>32/2	R	>8	R							>16	R					16	R			32		>2		>8	R			64	R	2	S			32
76076263	17-	Non-fermenter	P.aeruginosa	P.aeruginosa	negative	negative	pos	false positive	CarbA	false positive	<=4	S			>32/2	R	>8	R							>16	R					16	R					>2		>8	R		R			2	S
76076176	17-	Non-fermenter	P.aeruginosa	P.aeruginosa	negative	negative	pos	false positive	CarbD	false positive	8	S	16	R	>32/2	R	>8	R							>16	R					>16	R			64	R	>2		>8	R			>=256	R	2	S
76074943	17-	Enterobacterales	Enterobacter species	Enterobacter aerogenes (4MRGN)	negative	negative	pos	false positive	Carb	true negative	<=4	S			>32/2	R	>8	R		R		R			>16	R					4	I					>2	R	>8	R		R			0,5/4	S
76069594	17-	Enterobacterales	Klebsiella species	K.pneumoniae	KPC		pos	true positive	Carb	false negative	>16	R	64	R	>32/2	R	>8	R		R		R			>16	R			256	R	>16	R					>2	R	>8	R		R			2	S			4
76351106	17-	Enterobacterales	Enterobacter species	Enterobacter aerogenes (4MRGN)	negative	negative	pos	false positive	Carb	true negative	<=4	S			>32/2	R	>8	R		R		R			>16	R					4	I					>2	R	>8	R		R			0.25	S			2
76062521	17-	Non-fermenter	P.aeruginosa	P.aeruginosa	VIM		pos	true positive	Carb	false negative	>16	R	>=256	R	>32/2	R	>8	R							>16	R			>=256	R	>16	R			>=256	R	>2		>8	R		R			>8/4	R
77508544	17-	Enterobacterales	Enterobacter species	Enterobacter cloacae komplex	VIM		pos	true positive	Carb	false negative	<=4	I			>32/2	R	>8	R		R		R			>16	R					>16	R					>2	R	>8	R		R			>8/4	R			>=256
77507929	17-	Non-fermenter	P.aeruginosa	P.aeruginosa	negative	negative	pos	false positive	CarbD	false positive	8	S	16		>32/2	R	>8	R							>16	I					8	S					>2		>8	R		R			0.5	S
76059620	17-	Non-fermenter	P.aeruginosa	P.aeruginosa	negative	negative	pos	false positive	CarbD	false positive	<=4	S	8	S	>32/2	R	>8	R							8	I			16	I	<=1	S			32	R	>2		4	S		R			1	S
77506227	17-	Non-fermenter	P.aeruginosa	P.aeruginosa	IMP		pos	true positive	Carb	false negative	<=4	S			>32/2	R	>8	R							8	I					>16	R					>2		>8	R		R			>8/4	R			>=256
77041068	16-	Enterobacterales	Serratia species	Serratia marcescens (4MRGN)	NDM		pos	true positive	Carb	false negative	<=4	I			>32/2	R	>8	R		R		R			<=1	S			0.25	S	2	I					2	R	1	S		R			0.25	S
76048210	16-	Non-fermenter	P.aeruginosa	P.aeruginosa	negative	negative	pos	false positive	Carb	true positive	<=4	S			>32/2	R	>8	R							<=1	S					>16	R			32	R	>2		>8	R		R			2	S
76047557	16-	Non-fermenter	P.aeruginosa	P.aeruginosa	negative	negative	pos	false positive	CarbD	false positive	8	S			>32/2	R	>8	R							>16	R					>16	R			32	R	>2		>8	R		R			2	S
76046053	16-	Enterobacterales	Serratia species	Serratia marcescens (4MRGN)	Oxa-48, VIM		pos	true positive	CarbB	true positive	<=4	S	0.5	S	>32/2	R	>8	R		R		R			>16	R					16	R					>2	R	>8	R		R			2	S
76348449	16-	Enterobacterales	Serratia species	Serratia marcescens (4MRGN)	Oxa-48, VIM		pos	true positive	CarbB	true positive	<=4	S			>32/2	R	>8	R							>16	R					16	R					>2	R	>8	R					2	S
77127660	16-	Non-fermenter	P.aeruginosa	P.aeruginosa	negative	negative	pos	false positive	CarbA	false positive	<=4	S			>32/2	R	>8	R							>16	R					>16	R			16	R	>2		>8	R		R			>8/4	R			16
76041921	16-	Enterobacterales	Klebsiella species	K.pneumoniae	negative	negative	pos	false positive	Carb	true negative	>16	R			>32/2	R	>8	R		R		R			16	R					>16	R					>2	R	>8	R		R			>8/4	R
77127520	16-	Non-fermenter	P.aeruginosa	P.aeruginosa	negative	negative	pos	false positive	CarbA	false positive	<=4	S			>32/2	R	>8	R							>16	R					>16	R			>=256	R	>2		>8	R			>=256	R	>8/4	R
76035177	16-	Non-fermenter	P.aeruginosa	P.aeruginosa	VIM		pos	true positive	Carb	false negative	16	I			>32/2	R	>8	R							8	I					>16	R			16	R	>2		>8	R			16	R	>8/4	R
76034747	16-	Non-fermenter	P.aeruginosa	P.aeruginosa	negative	negative	pos	false positive	CarbA	false positive	8	S			>32/2	R	>8	R							>16	R					>16	R			32	R	>2		>8	R			64	R	2	S
76034227	16-	Non-fermenter	P.aeruginosa	P.aeruginosa	negative	negative	pos	false positive	CarbA	false positive	<=4	S			>32/2	R	>8	R							>16	R					16	R			16	R	>2		>8	R			16	R	2	S
76025822	16-	Non-fermenter	P.aeruginosa	P.aeruginosa	VIM		pos	true positive	CarbB	true positive	16	R	>=256		>32/2	R	>8	R							4	I					>16	R			64		>2		>8	R			64	R	>8/4	R
77493465	16-	Non-fermenter	P.aeruginosa	P.aeruginosa	VIM		pos	true positive	CarbB	true positive	16	R	>=256	R	>32/2	R	>8	R							8	I					>16	R					>2		>8	R		R			>8/4	R
76359919	18-	Non-fermenter	P.aeruginosa	P.aeruginosa	negative	negative	pos	false positive	CarbB	false positive	<=4	S			>32/2	R	>8	R							>16	R					>16	R			16	R	>2		>8	R			32	R	1	S			8
77550062	18-	Enterobacterales	E.coli	E.coli	Oxa-48		pos	true positive	Carb	false negative	<=4	S	2		>32/2	R	>8	R		R		R			16	R					>16	R					>2	R	8	R		R			<=0,25/4	S			0.25
76359435	18-	Non-fermenter	P.aeruginosa	P.aeruginosa	VIM		pos	true positive	CarbB	true positive	16	R			>32/2	R	>8	R							8	I					>16	R					>2		>8	R					>8/4	R
76137514	18-	Enterobacterales	Klebsiella species	K.pneumoniae	Oxa-48		pos	true positive	CarbD	true positive	<=4	S			>32/2	R	>8	R		R		R			>16	R					>16	R					>2	R	>8	R		R			0.5	S
76137186	18-	Non-fermenter	P.aeruginosa	P.aeruginosa	VIM		pos	true positive	CarbB	true positive	8	R	64	R	>32/2	R	>8	R							>16	R					>16	R			16	R	>2		>8	R		R			>8/4	R			64
76133815	18-	Non-fermenter	P.aeruginosa	P.aeruginosa	VIM		pos	true positive	CarbB	true positive	8	R			>32/2	R	>8	R							>16	R					>16	R					>2		>8	R		R			>8/4	R
77080510	18-	Non-fermenter	P.aeruginosa	P.aeruginosa	negative	negative	pos	false positive	CarbA	false positive	<=4	S			>32/2	R	>8	R							>16	R					>16	R					>2		>8	R		R			2	S
76129609	18-	Non-fermenter	P.aeruginosa	P.aeruginosa	negative	negative	pos	false positive	CarbA	false positive	8	S	4	S	>32/2	R	>8	R							>16	R					>16	R			16	R	>2		>8	R		R			>8/4	R			16
76129928	18-	Non-fermenter	P.aeruginosa	P.aeruginosa	negative	negative	pos	false positive	CarbA	false positive	<=4	S	2	S	>32/2	R	>8	R							>16	R					>16	R			16	R	>2		>8	R		R			2	S			16
76127148	18-	Non-fermenter	P.aeruginosa	P.aeruginosa	negative	negative	pos	false positive	CarbA	false positive	<=4	S			>32/2	R	>8	R							>16	R			128	R	>16	R			32	R	>2		>8	R		R			>8/4	R			64
76121098	18-	Enterobacterales	E.coli	E.coli	VIM		pos	true positive	CarbB	true positive	<=4	S	2	S	>32/2	R	>8	R		R		R			<=1	S					>16	R					>2	R	>8	R		R			>8/4	R			128
76119462	18-	Enterobacterales	Klebsiella species	K.pneumoniae	negative	negative	pos	false positive	Carb	true negative	<=4	S			>32/2	R	>8	R		R		R			<=1	S					8	R					<=0,5	S	4	I		R			0.5	S			2
76356898	17-	Non-fermenter	P.aeruginosa	P.aeruginosa	negative	negative	pos	false positive	CarbA	false positive	<=4	S			>32/2	R	>8	R							>16	R					>16	R					>2		>8	R			>=256	R	>8/4	R			>=256
76666129	17-	Non-fermenter	P.aeruginosa	P.aeruginosa	negative	negative	pos	false positive	CarbB	false positive	<=4	S			>32/2	R	>8	R							>16	R					>16	R					>2		>8	R		R			1	S			4
77069407	17-	Enterobacterales	Klebsiella species	K.pneumoniae	Oxa-48		pos	true positive	Carb	false negative	16	I	32	R	>32/2	R	>8	R		R		R			>16	R					>16	R					>2		>8	R		R			0.5	S			2
76355838	17-	Non-fermenter	P.aeruginosa	P.aeruginosa	negative	negative	pos	false positive	CarbB	false positive	<=4	S			>32/2	R	>8	R							>16	R					>16	R			>=256	R	>2		>8	R		R			>8/4	R			>=256
76105799	17-	Non-fermenter	Acinetobacter	Acinetobacter baumannii Komplex	NDM, OXA-24		pos	true positive	CarbD	true positive	>16	R			>32/2	R	>8	R							>16	R					16						>2		>8						>8/4
76104767	17-	Non-fermenter	P.aeruginosa	P.aeruginosa	negative	negative	pos	false positive	CarbA	false positive	<=4	S			>32/2	R	>8	R							>16	R					>16	R					>2		>8	R			16	R	2	S			8
77062946	17-	Non-fermenter	P.aeruginosa	P.aeruginosa	VIM		pos	true positive	Carb	false negative	>16	R	64	R	>32/2	R	>8	R							16	I					>16	R			32	R	>2		>8	R		R			>8/4	R			128
77552182	18-	Enterobacterales	Klebsiella species	K.pneumoniae	Oxa-48		pos	true positive	CarbD	true positive	<=4	S	4	S	>32/2	R	>8	R		R		R			>16	R					>16	R			>=256	R	>2	R	>8	R		R			0.25	S
77552186	18-	Non-fermenter	P.aeruginosa	P.aeruginosa	VIM		pos	true positive	CarbB	true positive	>16	R	64	R	>32/2	R	>8	R							16	I					16	R			16	R	>2		>8	R		R			2	S			16
77493288	16-	Enterobacterales	Enterobacter species	Enterobacter cloacae komplex	NDM		pos	true positive	CarbB	true positive	>16	R			>32/2	R	>8	R		R		R			>16	R					>16	R					>2	R	>8	R		R			>8/4	R
76023428	16-	Non-fermenter	Acinetobacter	Acinetobacter baumannii Komplex	Oxa-23		pos	true positive	CarbD	true positive	<=4	S			>32/2	R	>8	R					64		>16	R					>16						>2		>8						>8/4
76015458	16-	Enterobacterales	Klebsiella species	K.pneumoniae	negative	negative	pos	false positive	Carb	true negative	<=4	I			>32/2	R	>8	R		R		R			>16	R					>16	R					>2	R	>8	R		R			0.25	S
76015459	16-	Non-fermenter	P.aeruginosa	P.aeruginosa	VIM		pos	true positive	Carb	false negative	>16	R			>32/2	R	>8	R							>16	R					>16	R					>2		>8	R					>8/4	R
77481685	16-	Non-fermenter	Acinetobacter	Acinetobacter baumannii Komplex	Oxa-23		pos	true positive	CarbD	true positive	<=4	S			>32/2	R	>8	R							>16	R					>16						>2		>8						>8/4
77010015	15-	Enterobacterales	Klebsiella species	K.pneumoniae	Oxa-48		pos	true positive	CarbD	true positive	8	S			>32/2	R	>8	R							>16	R					>16	R					>2	R	>8	R					0.5	S
77467883	15-	Enterobacterales	Klebsiella species	K.pneumoniae	Oxa-48		pos	true positive	CarbD	true positive	>16	R	>=256	R	>32/2	R	>8	R		R		R			>16	R					>16	R					>2	R	8	R		R			0.25	S
77471965	15-	Enterobacterales	Klebsiella species	K.pneumoniae	Oxa-48		pos	true positive	CarbD	true positive	>16	R	>=256	R	>32/2	R	>8	R		R		R			>16	R					>16	R					>2	R	8	R			4	I	0.25	S
77031203	16-	Non-fermenter	Acinetobacter	Acinetobacter baumannii Komplex	Oxa23		pos	true positive	Carb	false negative	<=4	S	4	S	>32/2	R	>8	R							>16	R					>16						>2		>8						>8/4
76344377	16-	Non-fermenter	Acinetobacter	Acinetobacter baumannii Komplex	Oxa23		pos	true positive	CarbD	true positive	<=4	S			>32/2	R	>8	R							>16	R					>16						>2		>8						>8/4
76014781	16-	Non-fermenter	P.aeruginosa	P.aeruginosa	negative	negative	pos	false positive	Carb	true negative	<=4	S	4	S	>32/2	R	>8	R							>16	R					>16	R					>2		>8	R			>=256	R	>8/4	R
76295943	16-	Non-fermenter	P.aeruginosa	P.aeruginosa	negative	negative	pos	false positive	Carb	true negative	<=4	S	4	S	>32/2	R	>8	R							>16	R					>16	R					>2		>8	R			>=256	R	>8/4	R
76298521	16-	Non-fermenter	P.aeruginosa	P.aeruginosa	VIM		pos	true positive	CarbB	true positive	>16	R	>=256		>32/2	R	>8	R							>16	R					>16	R					>2		>8	R		R			>8/4	R
76260984	15-	Enterobacterales	Klebsiella species	K.pneumoniae	negative	negative	pos	false positive	Carb	true negative	<=4	S			>32/2	R	>8	R		R		R			>16	R					>16	R					>2	R	>8	R		R			0.5	S
76271742	15-	Enterobacterales	Klebsiella species	K.pneumoniae	Oxa-48		pos	true positive	CarbD	true positive	>16	R			>32/2	R	>8	R		R		R			>16	R					>16	R					>2	R	8	R		R			0.5	S
76337910	15-	Non-fermenter	P.aeruginosa	P.aeruginosa	negative	negative	pos	false positive	CarbB	false positive	<=4	S			>32/2	R	>8	R							>16	R					16	R					>2		>8	R					1	S
76245224	15-	Non-fermenter	P.aeruginosa	P.aeruginosa	Oxa-48		pos	true positive	CarbA	false positive	<=4	S			>32/2	R	>8	R							>16	R					>16	R					>2		>8	R					2	S
77450645	15-	Non-fermenter	P.aeruginosa	P.aeruginosa	negative	negative	pos	false positive	CarbA	false positive	8	S			>32/2	R	>8	R							>16	R					>16	R					>2		>8	R					>8/4	R
76216210	15-	Enterobacterales	Klebsiella species	K.pneumoniae	Oxa-48		pos	true positive	CarbD	true positive	>16	R			>32/2	R	>8	R							>16	R					>16	R					>2	R	>8	R					0.5	S
76341874	15-	Enterobacterales	Klebsiella species	K.pneumoniae	Oxa-48		pos	true positive	Carb	false negative	>16	R			>32/2	R	>8	R		R		R			16	R					>16	R					>2	R	>8	R		R			1	S
77469149	15-	Enterobacterales	Klebsiella species	K.pneumoniae	Oxa-48		pos	true positive	CarbD	true positive	>16	R	>=256	R	>32/2	R	>8	R		R		R			>16	R					>16	R					>2	R	8	R		R			0.25	S
76008919	16-	Non-fermenter	P.aeruginosa	P.aeruginosa	VIM		pos	true positive	CarbB	true positive	16	I	64	R	>32/2	R	>8	R							8	I					>16	R					>2		>8	R		R			>8/4	R
76274717	15-	Non-fermenter	P.aeruginosa	P.aeruginosa	VIM		pos	true positive	CarbB	true positive	8	S			>32/2	R	>8	R							>16	R					>16	R					>2		>8	R		R			>8/4	R
77464314	15-	Non-fermenter	P.aeruginosa	P.aeruginosa	VIM		pos	true positive	Carb	false negative	>16	R			>32/2	R	>8	R							>16	R					>16	R					>2		>8	R					>8/4	R
77122535	15-	Enterobacterales	Klebsiella species	K.pneumoniae	Oxa-48		pos	true positive	CarbD	true positive	>16	R	>=256		>32/2	R	>8	R		R		R			>16	R					>16	R					>2	R	8	R		R			0.25	S
76341460	15-	Non-fermenter	P.aeruginosa	P.aeruginosa	negative	negative	pos	false positive	CarbB	false positive	<=4	S			>32/2	R	>8	R							2	I					4	S					>2		>8	R			32	R	0.5	S
76290818	16-	Non-fermenter	P.aeruginosa	P.aeruginosa	negative	negative	neg	true negative	-	true negative	<=4	S			>32/2	R	>8	R							>16	R					16	R					>2		>8	R			64	R	2	S
76282387	16-	Non-fermenter	P.aeruginosa	P.aeruginosa	negative	negative	neg	true negative	-	true negative	<=4	S			>32/2	R	>8	R							4	I					4	S					>2		4	S		R			0.5	S
76271947	15-	Non-fermenter	P.aeruginosa	P.aeruginosa	VIM		pos	true positive	CarbB	true positive	8	R			>32/2	R	>8	R							>16	R					>16	R			32		>2		>8	R			64	R	>8/4	R
76005459	16-	Non-fermenter	P.aeruginosa	P.aeruginosa	negative	negative	pos	false positive	Carb	true negative	<=4	S			>32/2	R	>8	R							>16	R					>16	R					>2		>8	R			>=256	R	>8/4	R
76343609	16-	Non-fermenter	P.aeruginosa	P.aeruginosa	negative	negative	neg	true negative	-	true negative	<=4	S			>32/2	R	>8	R							>16	R					8	S					>2		8	S			32	R	2	S
76342163	15-	Non-fermenter	P.aeruginosa	P.aeruginosa	negative	negative	pos	false positive	CarbD	false positive	8	S			>32/2	R	>8	R							>16	R					>16	R					>2		>8	R		R			1	S
76287497	16-	Non-fermenter	P.aeruginosa	P.aeruginosa	VIM		pos	true positive	CarbB	true positive	8	R			>32/2	R	>8	R							>16	R					>16	R					>2		>8	R			32	R	>8/4	R
15408	16-	Non-fermenter	P.aeruginosa	P.aeruginosa	negative	negative	pos	false positive	CarbA	false positive	<=4	S	8	S	>32/2	R	>8	R							16	I					16	R					>2		>8	R		R			2	S
76017742	16-	Non-fermenter	Acinetobacter	Acinetobacter baumannii Komplex	Oxa-23		pos	true positive	CarbD	true positive	<=4	S			>32/2	R	>8	R							>16	R					>16						>2		>8						>8/4
77466627	15-	Enterobacterales	Klebsiella species	K.oxytoca	VIM		pos	true positive	CarbB	true positive	<=4	I			>32/2	R	>8	R		R		R			>16	R					>16	R					>2	R	>8	R		R			>8/4	R
76278307	15-	Non-fermenter	P.aeruginosa	P.aeruginosa	negative	negative	pos	false positive	CarbA	false positive	<=4	S			>32/2	R	>8	R							>16	R					>16	R					>2		>8	R					2	S
76286762	16-	Enterobacterales	Klebsiella species	K.pneumoniae	negative	negative	pos	false positive	Carb	true negative	<=4	I			>32/2	R	>8	R		R		R			>16	R					>16	R					>2	R	>8	R			>=256	R	0.5	S
76651333	16-	Non-fermenter	P.aeruginosa	P.aeruginosa	negative	negative	neg	true negative	-	true negative	<=4	S			>32/2	R	>8	R							>16	R					8	S					>2		8	S		R			2	S
77480543	16-	Non-fermenter	P.aeruginosa	P.aeruginosa	negative	negative	neg	true negative	-	true negative	<=4	S	0.5	S	>32/2	R	>8	R							8	I					4	S					>2		>8	R		R			0.25	S
76013335	16-	Enterobacterales	Klebsiella species	K.pneumoniae	negative	negative	pos	false positive	Carb	true negative	8	I			>32/2	R	>8	R		R		R			>16	R					>16	R					>2	R	>8	R		R			0.25	S
76290893	16-	Non-fermenter	Acinetobacter	Acinetobacter baumannii Komplex	Oxa23		pos	true positive	Carb	false negative	>16	R	>=256		>32/2	R	>8	R							>16	R					>16						>2		>8						>8/4
76289217	16-	Enterobacterales	E.coli	E.coli	NDM		pos	true positive	CarbB	true positive	>16	R	>=256		>32/2	R	>8	R		R		R			>16	R					>16	R					>2	R	>8	R		R			>8/4	R
76645905	15-	Non-fermenter	P.aeruginosa	P.aeruginosa	negative	negative	pos	false positive	CarbA	false positive	<=4	S			>32/2	R	>8	R							>16	R					>16	R			64	R	>2		>8	R			>=256	R	>8/4	R
77478748	16-	Non-fermenter	Acinetobacter	Acinetobacter baumannii Komplex	Oxa-23		pos	true positive	CarbD	true positive	>16	R	>=256		>32/2	R	>8	R							>16	R					>16	R					>2		>8						>8/4
76277740	15-	Enterobacterales	Klebsiella species	K.pneumoniae	Oxa-48		pos	true positive	CarbD	true positive	>16	R	>=256		>32/2	R	>8	R		R		R			>16	R					>16	R					>2	R	8	R			4	R	0.25	S
76272082	15-	Non-fermenter	P.aeruginosa	P.aeruginosa	negative	negative	pos	false positive	CarbA	false positive	<=4	S			>32/2	R	>8	R							>16	R					>16	R					>2		>8	R					>8/4	R
77477502	16-	Non-fermenter	P.aeruginosa	P.aeruginosa	negative	negative	pos	false positive	CarbA	false positive	<=4	S			>32/2	R	>8	R							>16	R					>16	R					>2		>8	R			32	R	2	S
76272157	15-	Enterobacterales	Klebsiella species	K.pneumoniae	Oxa-48		pos	true positive	CarbD	true positive	>16	R			>32/2	R	>8	R		R		R			>16	R					>16	R					>2	R	8	R			4	R	0.25	S
76342151	15-	Enterobacterales	Enterobacter species	Enterobacter cloacae komplex	Oxa-48		pos	true positive	CarbD	true positive	>16	R			>32/2	R	>8	R		R		R			16	R					>16	R					>2	R	4	I		R			1	S
76015492	16-	Non-fermenter	P.aeruginosa	P.aeruginosa	VIM		pos	true positive	CarbB	true positive	>16	R	>=256		>32/2	R	>8	R							8	I					>16	R					>2		>8	R			>=256	R	>8/4	R
76263526	15-	Enterobacterales	Enterobacter species	Enterobacter cloacae komplex	VIM		pos	true positive	CarbB	true positive	<=4	I	1	S	>32/2	R	>8	R		R		R			>16	R					>16	R					>2	R	>8	R		R			>8/4	R
76299003	16-	Non-fermenter	P.aeruginosa	P.aeruginosa	VIM		pos	true positive	CarbB	true positive	<=4	S	16		>32/2	R	>8	R							4	I					>16	R					>2		>8	R			>=256	R	>8/4	R
76258335	15-	Non-fermenter	P.aeruginosa	P.aeruginosa	GES		neg	false negative	-	false negative	<=4	S			>32/2	R	>8	R							>16	R					16	R					>2		>8	R		R			0.5	S
76017803	16-	Non-fermenter	P.aeruginosa	P.aeruginosa	negative	negative	neg	true negative	-	true negative	<=4	S			>32/2	R	>8	R													2	S					>2		8	S		R			2	S
76267221	15-	Non-fermenter	P.aeruginosa	P.aeruginosa	negative	negative	pos	false positive	CarbD	false positive	<=4	S			>32/2	R	>8	R							>16	R					16	R					>2		>8	R		R			1	S
76344593	16-	Non-fermenter	Acinetobacter	Acinetobacter baumannii Komplex	Oxa-23		pos	true positive	CarbD	true positive	<=4	S	4		>32/2	R	>8	R							>16	R					>16						>2		>8						>8/4
76272412	15-	Enterobacterales	E.coli	E.coli	negative	negative	pos	false positive	CarbB	false positive	<=4	S			>32/2	R	>8	R		R		R			>16	R					>16	R					>2	R	>8	R		R			>8/4	R
77010001	15-	Enterobacterales	Enterobacter species	Enterobacter cloacae komplex	negative	negative	neg	true negative	-	true negative	<=4	S			>32/2	R	>8	R		R		R			>16	R					8	R					>2	R	>8	R		R			2	S
76283019	16-	Non-fermenter	P.aeruginosa	P.aeruginosa	negative	negative	pos	false positive	Carb	true negative	8	S	16	R	>32/2	R	>8	R							>16	R					>16	R					>2		>8	R		R			>8/4	R
76346876	16-	Non-fermenter	Acinetobacter	Acinetobacter baumannii Komplex	Oxa-23		pos	true positive	CarbD	true positive	<=4	S			>32/2	R	>8	R					32		>16	R					>16						>2		>8						>8/4
76000196	16-	Non-fermenter	Acinetobacter	Acinetobacter baumannii Komplex	Oxa-23		pos	true positive	CarbD	true positive	8	S	4		>32/2	R	>8	R							>16	R					>16						>2		>8						>8/4
76345524	16-	Non-fermenter	P.aeruginosa	P.aeruginosa	VIM		pos	true positive	CarbB	true positive	<=4	S	16	I	>32/2	R	>8	R							4	I					>16	R					>2		>8	R		R			>8/4	R
76645300	15-	Non-fermenter	P.aeruginosa	P.aeruginosa	negative	negative	pos	false positive	CarbA	false positive	<=4	S			>32/2	R	>8	R							>16	R					8	S					>2		4	S		R			2	S
76004147	16-	Non-fermenter	Acinetobacter	Acinetobacter baumannii Komplex	Oxa-23		pos	true positive	CarbD	true positive	>16	R			>32/2	R	>8	R							>16	R					>16						>2		>8						>8/4
76259313	15-	Non-fermenter	Acinetobacter	Acinetobacter baumannii Komplex	negative	negative	pos	false positive	Carb	true negative	>16	R	64		>32/2	R	>8	R							>16	R					>16						>2		8						2
76272089	15-	Enterobacterales	Klebsiella species	K.pneumoniae	Oxa-48		pos	true positive	CarbD	true positive	>16	R			>32/2	R	>8	R		R		R			>16	R					>16	R					>2	R	8	R		R			0.25	S
76028292	16-	Non-fermenter	P.aeruginosa	P.aeruginosa	negative	negative	pos	false positive	CarbA	false positive	<=4	S			>32/2	R	>8	R							>16	R					>16	R					>2		>8	R		R			2	S
76276091	15-	Non-fermenter	P.aeruginosa	P.aeruginosa	negative	negative	pos	false positive	CarbA	false positive	<=4	S			>32/2	R	>8	R							>16	R					>16	R					>2		>8	R		R			>8/4	R
76021919	16-	Non-fermenter	Acinetobacter	Acinetobacter baumannii Komplex	Oxa-24		pos	true positive	CarbD	true positive	>16	R			>32/2	R	>8	R							>16	R					>16						>2		>8						>8/4
77478511	16-	Non-fermenter	P.aeruginosa	P.aeruginosa	VIM		pos	true positive	Carb	false negative	>16	R	>=256	R	>32/2	R	>8	R							16	I					16	R					>2		>8	R					>8/4	R
76346678	16-	Non-fermenter	Acinetobacter	Acinetobacter baumannii Komplex	Oxa-23		pos	true positive	CarbD	true positive	<=4	S			>32/2	R	>8	R							>16	R					>16						>2		>8						>8/4
76296603	16-	Enterobacterales	Klebsiella species	K.pneumoniae	Oxa-48		pos	true positive	CarbD	true positive	<=4	S			>32/2	R	>8	R							>16	R					>16	R					>2	R	>8	R					0.25	S
77471440	15-	Enterobacterales	Klebsiella species	K.pneumoniae	Oxa-48		pos	true positive	CarbD	true positive	>16	R	>=256	R	>32/2	R	>8	R							>16	R					>16	R					>2	R	8	R			4	I	0.25	S
76014304	16-	Non-fermenter	P.aeruginosa	P.aeruginosa	VIM		pos	true positive	CarbB	true positive	>16	R			>32/2	R	>8	R							>16	R					>16	R					>2		>8	R					>8/4	R
76283321	16-	Enterobacterales	Klebsiella species	K.pneumoniae	Oxa-48		pos	true positive	CarbD	true positive	<=4	S			>32/2	R	>8	R		R		R			>16	R					>16	R					>2	R	>8	R		R			0.25	S
76297775	16-	Enterobacterales	Klebsiella species	K.pneumoniae	Oxa-48		pos	true positive	CarbD	true positive	>16	R			>32/2	R	>8	R							>16	R					>16	R					>2	R	8	R					0.25	S
76000347	16-	Enterobacterales	E.coli	E.coli	NDM		pos	true positive	CarbB	true positive	>16	R	>=256	R	>32/2	R	>8	R		R		R			>16	R					>16	R					>2	R	>8	R			>=256	R	>8/4	R
76296459	16-	Non-fermenter	Acinetobacter	Acinetobacter baumannii Komplex	Oxa-23		pos	true positive	CarbD	true positive	<=4	S	4	S	>32/2	R	>8	R							>16	R					>16						>2		>8						>8/4
76286951	16-	Non-fermenter	P.aeruginosa	P.aeruginosa	negative	negative	neg	true negative	-	true negative	<=4	S	32	R	>32/2	R	>8	R							>16	R					>16	R					>2		8	S					2	S
76275094	15-	Enterobacterales	E.coli	E.coli	VIM		pos	true positive	Carb	false negative	16	I			>32/2	R	>8	R							>16	R					>16	R					>2	R	>8	R					0.25	S
77482846	16-	Non-fermenter	P.aeruginosa	P.aeruginosa	negative	negative	pos	false positive	CarbB	false positive	<=4	S			>32/2	R	>8	R							>16	R					>16	R					>2		>8	R			32	R	>8/4	R
77474212	16-	Non-fermenter	P.aeruginosa	P.aeruginosa	VIM		pos	true positive	Carb	false negative	16	I			>32/2	R	>8	R							>16	R					16	R					>2		>8	R			16	R	>8/4	R
76272416	15-	Enterobacterales	Klebsiella species	K.pneumoniae	negative	negative	pos	false positive	Carb	true negative	16	I			>32/2	R	>8	R							>16	R					>16	R					>2		>8	R			>=256	R	0.5	S
76346861	16-	Non-fermenter	P.aeruginosa	P.aeruginosa	negative	negative	pos	false positive	CarbA	false positive	<=4	S	4	S	>32/2	R	>8	R							>16	R			>=256	R	>16	R					>2		>8	R		R			>8/4	R
76269541	15-	Non-fermenter	P.aeruginosa	P.aeruginosa	negative	negative	neg	true negative	-	true negative	8	S			>32/2	R	>8	R							>16	R					>16	R					>2		>8	R		R			0.5
76346900	16-	Non-fermenter	P.aeruginosa	P.aeruginosa	VIM		pos	true positive	CarbB	true positive	8	R			>32/2	R	>8	R							>16	R					>16	R					>2		>8	R		R	16	R	>8/4	R
76291330	16-	Non-fermenter	P.aeruginosa	P.aeruginosa	VIM		pos	true positive	CarbB	true positive	8	R			>32/2	R	>8	R							16	I					>16	R					>2		>8	R		R	32	R	>8/4	R
76002429	16-	Non-fermenter	P.aeruginosa	P.aeruginosa	negative	negative	pos	false positive	CarbA	false positive	<=4	S			>32/2	R	>8	R							>16	R					16	R					>2		>8	R			8	I	2	S
76346935	16-	Non-fermenter	Acinetobacter	Acinetobacter baumannii Komplex	Oxa-23		pos	true positive	Carb	false negative	<=4	S			>32/2	R	>8	R							>16	R					>16						>2		>8						>8/4
76152980	18-	Non-fermenter	P.aeruginosa	P.aeruginosa	negative	negative	pos	false positive	CarbB	false positive	<=4	S			>32/2	R	>8	R							>16	R					16	R					>2		>8	R					>8/4	R
76006255	16-	Enterobacterales	Enterobacter species	Enterobacter aerogenes (4MRGN)	negative	negative	pos	false positive	Carb	true negative	<=4	S			>32/2	R	>8	R							>16	R					8	R					>2	R	>8	R					0.5	S
77490429	16-	Enterobacterales	Klebsiella species	K.pneumoniae	Oxa-48		pos	true positive	CarbD	true positive	>16	R	>=256	R	>32/2	R	>8	R		R		R			>16	R					>16	R					>2	R	8	R		R			0.25	S		S
76346738	16-	Non-fermenter	P.aeruginosa	P.aeruginosa	VIM		pos	true positive	CarbB	true positive	<=4	S	8	R	>32/2	R	>8	R							16	I					>16	R					>2		>8	R		R	>=256	R	>8/4	R
77124506	16-	Non-fermenter	P.aeruginosa	P.aeruginosa	VIM		pos	true positive	Carb	false negative	>16	R			>32/2	R	>8	R							8	I					>16	R					>2		>8	R			16	R	>8/4	R
76255311	15-	Non-fermenter	P.aeruginosa	P.aeruginosa	VIM		pos	true positive	Carb	false negative	16	I	16	R	>32/2	R	>8	R							<=1	S					16	R					>2		>8	R		R			2	S
76254869	15-	Enterobacterales	Klebsiella species	K.pneumoniae	Oxa-48		pos	true positive	CarbD	true positive	<=4	S			>32/2	R	>8	R		R		R			>16	R					>16	R					>2	R	>8	R		R			0,5/4	S
76253490	15-	Non-fermenter	P.aeruginosa	P.aeruginosa	VIM		pos	true positive	CarbB	true positive	>16	R	64	R	>32/2	R	>8	R							>16	R					>16	R					>2		>8	R		R			>8/4	R
76253268	15-	Enterobacterales	Klebsiella species	K.pneumoniae	KPC		pos	true positive	CarbA	true positive	<=4	S			>32/2	R	>8	R		R		R			>16	R					8	R					>2	R	>8	R		R			0.25	S
76251461	15-	Non-fermenter	Acinetobacter	Acinetobacter baumannii Komplex	Oxa-23		pos	true positive	Carb	false negative	>16	R	>=256		>32/2	R	>8	R							>16	R					>16						>2		>8						>8/4
77459950	15-	Non-fermenter	Acinetobacter	Acinetobacter baumannii Komplex	negative	negative	pos	false positive	Carb	true negative	8	S			>32/2	R	>8	R							>16	R					>16						>2		8						1
76248742	15-	Non-fermenter	P.aeruginosa	P.aeruginosa	VIM		pos	true positive	CarbA	false positive	>16	R	>=256	R	>32/2	R	>8	R							>16	R					>16	R					>2		>8	R		R			>8/4	R
76246785	15-	Non-fermenter	P.aeruginosa	P.aeruginosa	negative	negative	pos	false positive	CarbD	false positive	<=4	S			>32/2	R	>8	R							>16	R					>16	R					>2		>8	R					>8/4	R
76999642	15-	Non-fermenter	P.aeruginosa	P.aeruginosa	negative	negative	pos	false positive	CarbD	false positive	<=4	S	2		>32/2	R	>8	R							>16	R					16	R					>2		>8	R		R			1	S
76245156	15-	Non-fermenter	P.aeruginosa	P.aeruginosa	negative	negative	pos	false positive	CarbA	false positive	<=4	S			>32/2	R	>8	R							>16	R					>16	R					>2		>8	R		R			>8/4	R
76243133	15-	Enterobacterales	Enterobacter species	Enterobacter cloacae komplex	negative	negative	neg	true negative	-	true negative	<=4	S	1	S	>32/2	R	>8	R		R		R			>16	R					>16	R					>2	R	>8	R		R			0.5	S
76998526	15-	Enterobacterales	Serratia species	S. marcescens	VIM		pos	true positive	CarbD	false positive	<=4	S			>32/2	R	>8	R		R		R			>16	R					16	R					>2	R	>8	R		R			>8/4	R
76241374	15-	Non-fermenter	P.aeruginosa	P.aeruginosa	negative	negative	pos	false positive	CarbA	false positive	8	S	16	R	>32/2	R	>8	R							>16	R					>16	R					>2		>8	R		R			>8/4	R
76238626	15-	Enterobacterales	Enterobacter species	Enterobacter cloacae komplex	negative	negative	neg	true negative	-	true negative	<=4	S			>32/2	R	>8	R		R		R			>16	R					>16	R					>2	R	>8	R		R			1	S
76237627	15-	Enterobacterales	Klebsiella species	K.pneumoniae	Oxa-48		pos	true positive	CarbD	true positive	8	S	8		>32/2	R	>8	R		R		R			>16	R					>16	R					>2	R	>8	R		R			0.5	S
76337941	15-	Non-fermenter	P.aeruginosa	P.aeruginosa	VIM		pos	true positive	Carb	false negative	>16	R	>=256	R	>32/2	R	>8	R							>16	R					>16	R					>2		>8	R		R			>8/4	R
77453681	15-	Non-fermenter	P.aeruginosa	P.aeruginosa	VIM		pos	true positive	Carb	false negative	8	R			>32/2	R	>8	R							>16	R					>16	R					>2		>8	R		R			>8/4	R
76236661	15-	Non-fermenter	P.aeruginosa	P.aeruginosa	negative	negative	pos	false positive	CarbD	false positive	8	S			>32/2	R	>8	R							>16	R					>16	R					>2		>8	R		R			1	S
76233568	15-	Enterobacterales	Klebsiella species	K.pneumoniae	Oxa-48		pos	true positive	CarbD	true positive	8	S	16		>32/2	R	>8	R		R		R			>16	R					>16	R					>2	R	>8	R		R			0.25	S
76233418	15-	Non-fermenter	P.aeruginosa	P.aeruginosa	VIM		pos	true positive	CarbB	true positive	>16	R			>32/2	R	>8	R							>16	R					>16	R			16		>2		>8	R			16	R	>8/4	R
76233206	15-	Non-fermenter	P.aeruginosa	P.aeruginosa	VIM		pos	true positive	CarbB	true positive	>16	R			>32/2	R	>8	R							8	I					16	R			32		>2		>8	R			16	R	>8/4	R
76232189	15-	Enterobacterales	Klebsiella species	K.pneumoniae	Oxa-48		pos	true positive	CarbD	true positive	<=4	S			>32/2	R	>8	R							>16	R					>16	R					>2	R	>8	R					0.25	S
76228465	15-	Enterobacterales	Klebsiella species	K.pneumoniae	VIM		pos	true positive	Carb	false negative	>16	R			>32/2	R	>8	R							>16	R					>16	R					>2		>8	R			16	R	>8/4	R
14800	15-	Non-fermenter	Acinetobacter	Acinetobacter baumannii Komplex	Oxa-23		pos	true positive	Carb	false negative	>16	R			>32/2	R	>8	R							>16	R					>16						>2		>8	R					>8/4
77449260	15-	Enterobacterales	E.coli	E.coli	NDM		pos	true positive	CarbB	true positive	<=4	S			>32/2	R	>8	R		R		R			<=1	S					>16	R					>2	R	>8	R		R			>8/4	R
76222992	15-	Enterobacterales	Klebsiella species	K.pneumoniae	negative	negative	pos	false positive	Carb	true negative	<=4	S			>32/2	R	>8	R		R		R			>16	R					>16	R					>2	R	>8	R			>=256	R	1	S
76221614	15-	Non-fermenter	P.aeruginosa	P.aeruginosa	VIM		pos	true positive	CarbB	true positive	>16	R	>=256		>32/2	R	>8	R							>16	R					>16	R					>2		>8	R		R			>8/4	R
76990300	15-	Non-fermenter	P.aeruginosa	P.aeruginosa	VIM		pos	true positive	CarbB	true positive	>16	S	>=256	R	>32/2	R	>8	R							>16	R					>16	R					>2		>8	R			32	R	>8/4	R
76639056	15-	Enterobacterales	Klebsiella species	K.pneumoniae	Oxa-48		pos	true positive	CarbD	true positive	8	S			>32/2	R	>8	R		R		R			>16	R					>16	R					>2	R	>8	R		R			0.25	S
76218864	15-	Non-fermenter	P.aeruginosa	P.aeruginosa	VIM		pos	true positive	CarbB	true positive	>16	R	>=256		>32/2	R	>8	R							>16	R					>16	R					>2		>8	R		R			>8/4	R
76218783	15-	Non-fermenter	P.aeruginosa	P.aeruginosa	negative	negative	neg	true negative	-	true negative	8	S	8		>32/2	R	>8	R							8	I					16	R					>2	R	8	S		R			0.5	S
17570	15-	Non-fermenter	Acinetobacter	Acinetobacter baumannii Komplex	Oxa-23		pos	true positive	Carb	false negative	>16	R			>32/2	R	>8	R							>16	R					>16						>2		>8						>8/4
76217706	15-	Non-fermenter	P.aeruginosa	P.aeruginosa	VIM		pos	true positive	CarbB	true positive	16	I			>32/2	R	>8	R							>16	R					>16	R					>2		>8	R			>=256	R	>8/4	R
76335520	15-	Enterobacterales	Klebsiella species	K.pneumoniae	Oxa-48		pos	true positive	CarbD	true positive	8	S	8		>32/2	R	>8	R		R		R			>16	R					>16	R					>2	R	>8	R		R			0.25	S
76215687	15-	Non-fermenter	P.aeruginosa	P.aeruginosa	VIM; KPC		pos	true positive	CarbA	true positive	<=4	S			>32/2	R	>8	R							2	I					>16	R					>2		>8	R		R			2	S
76213317	15-	Enterobacterales	Klebsiella species	K.pneumoniae	Oxa-48		pos	true positive	CarbD	true positive	<=4	S	8		>32/2	R	>8	R		R		R			>16	R					>16	R					>2	R	>8	R		R			0.25	S
76638177	15-	Enterobacterales	Klebsiella species	K.pneumoniae	Oxa-48		pos	true positive	CarbD	true positive	<=4	S	8		>32/2	R	>8	R		R		R			>16	R					>16	R					>2	R	>8	R		R			0.5	S
76140480	18-	Non-fermenter	P.aeruginosa	P.aeruginosa	VIM		pos	true positive	Carb	false negative	>16	R	>=256		>32/2	R	>8	R							>16	R			32		>16	R			>=256		>2		>8	R		R			>8/4	R			2
76140917	18-	Enterobacterales	Klebsiella species	K.oxytoca	VIM		pos	true positive	CarbB	true positive	8	I			>32/2	R	>8	R							>16	R					>16	R					>2	R	>8	R					>8/4	R
77550062	18-	Enterobacterales	E.coli	E.coli	Oxa-48		pos	true positive	Carb	false negative	<=4	S			>32/2	R	>8	R							16	R					>16	R					>2	R	8	R					<=0,25/4	S
76359435	18-	Non-fermenter	P.aeruginosa	P.aeruginosa	VIM		pos	true positive	CarbB	true positive	>16	R			>32/2	R	>8	R							8	I					>16	R					>2		>8	R					>8/4	R
76140481	18-	Non-fermenter	P.aeruginosa	P.aeruginosa	VIM		pos	true positive	CarbB	true positive	>16	R			>32/2	R	>8	R							8	I					>16	R					>2		>8	R					>8/4	R
76359919	18-	Non-fermenter	P.aeruginosa	P.aeruginosa	negative	negative	neg	true negative	-	true negative	<=4	S			>32/2	R	>8	R							>16	R					>16	R					>2		>8	R					1	S
77552186	18-	Non-fermenter	P.aeruginosa	P.aeruginosa	VIM		pos	true positive	CarbB	true positive	>16	R			>32/2	R	>8	R							16	I					16	R					>2		>8	R					2	S
[truncated: 109 more columns]
